# Supplementary material
Source: publisher figshare collection journal article supplement (https://tandf.figshare.com/ndownloader/files/22257231)
Supplement: Supplementary file 1 [file 22257231]

# Supplementary Material for “Logarithmic Calibration for Partial Linear Models with Multiplicative Distortion Measurement Errors”<sup>1</sup>

## 1. CONDITIONS

We now list the assumptions needed in the proof of theorems.

- (C1) The distortion functions  $\phi(u) > 0$  and  $\psi_r(u) > 0$ ,  $r = 1, \dots, p$ , for all  $u \in [\mathcal{U}_L, \mathcal{U}_R]$ , where  $[\mathcal{U}_L, \mathcal{U}_R]$  denotes the compact support of  $U$ . Moreover, the distortion functions  $\phi(u)$  and  $\psi_r(u)$ 's have three continuous derivatives. The density function  $f_U(u)$  of the random variable  $U$  is bounded away from 0 and satisfies the Lipschitz condition of order 1 on  $[\mathcal{U}_L, \mathcal{U}_R]$ .
- (C2) For some  $s \geq 4$ ,  $E(|Y|^s) < \infty$ ,  $E(|X_r|^s) < \infty$ ,  $r = 1, \dots, p$ . The matrix  $\Sigma_0$  defined in Theorem 2 is a positive-definite matrix.
- (C3) The kernel function  $K(\cdot)$  is a symmetric bounded density function supported on  $[-A, A]$  satisfying a Lipschitz condition.  $K(\cdot)$  also has second-order continuous bounded derivatives, satisfying  $K^{(j)}(\pm A) = 0$  with  $K^{(j)}(t) = \frac{d^j K(t)}{dt^j}$ , and  $\mu_2 = \int_{-A}^A s^2 K(s) ds \neq 0$ ,  $\mu_{K^2} = \int_{-A}^A K^2(s) ds > 0$ .
- (C4) As  $n \rightarrow \infty$ , the bandwidths  $h$  and  $h_1$  satisfy  $nh^4 \rightarrow 0$ ,  $\frac{\log^2 n}{nh^2} \rightarrow 0$  and  $nh_1^8 \rightarrow 0$  and  $\frac{\log^2 n}{nh_1^2} \rightarrow 0$ .
- (C5) The density function of  $Z$ ,  $f_Z(z)$  is bounded away from zero on  $\mathcal{Z}$ , where  $\mathcal{Z}$  is a compact support set in  $\mathcal{R}^1$ . Moreover,  $f_Z(z)$ ,  $E(X_s|Z = z)$ ,  $E(Y|Z = z)$  and  $g(z)$  have bounded continuous second order derivatives on  $\mathcal{Z}$ .
- (C6) For all  $\zeta_j$   $j = 1, \dots, p$ ,  $\zeta_j \rightarrow 0$ ,  $\sqrt{n}\zeta_j \rightarrow \infty$  as  $n \rightarrow \infty$ ,

$$\liminf_{n \rightarrow \infty} \liminf_{u \rightarrow 0^+} p'_{\zeta_j}(u) / \zeta_j > 0.$$

## 2. APPENDIX

### 2.1. A Technical Lemma

*Lemma 1* Suppose  $E(W|V = v) = w(v)$  and its derivatives up to second order are bounded for all  $v \in [\mathcal{V}_L, \mathcal{V}_R]$ , where  $[\mathcal{V}_L, \mathcal{V}_R]$  denotes the compact support of  $V$ .  $E|W|^3$  exists and  $\sup_v \int |w|^s f(v, w) dw < \infty$  for some  $s > 0$ , where  $f(v, w)$  is the joint density of  $(V, W)^T$ . Suppose  $(V_i, W_i)$ ,  $i = 1, 2, \dots, n$  are independent and identically distributed (i.i.d.) samples from  $(V, W)$ . If condition (C3) holds true for kernel function  $K(v)$ , and  $n^{2\epsilon-1}h \rightarrow \infty$  for  $\epsilon < 1 - s^{-1}$ , we have

$$\sup_{v \in [\mathcal{V}_L, \mathcal{V}_R]} \left| \frac{1}{n} \sum_{i=1}^n K_h(V_i - v) W_i - f_V(v) w(v) - \frac{1}{2} [f_V(v) w(v)]'' \mu_2 h^2 \right| = O(\tau_{n,h}), a.s.$$

where,  $f_V(v)$  is the density function of  $V$ , and  $\tau_{n,h} = h^3 + \sqrt{\log n/(nh)}$ .

**Proof** Lemma 1 can be immediately proved from the result obtained by Mack and Silverman (1982).

## 2.2. Proof of Theorem 1

Recalling that  $\tilde{Y}_i = \phi(U_i)Y_i = Y_i \exp(\ln(\phi(U_i)))$ , we have

$$\begin{aligned}\hat{Y}_i - Y_i &= \tilde{Y}_i \exp\left(-\left\{\hat{m}_{\ln(|\tilde{Y}|)}(U_i) - \overline{\ln(|\tilde{Y}|)}\right\}\right) - Y_i \\ &= Y_i \left\{\exp\left(\ln(\phi(U_i)) - \left\{\hat{m}_{\ln(|\tilde{Y}|)}(U_i) - \overline{\ln(|\tilde{Y}|)}\right\}\right) - 1\right\}.\end{aligned}\quad (\text{A.1})$$

Using Lemma 1, recalling the definition of  $\hat{m}_{\ln(|\tilde{Y}|)}(u)$ , we have

$$\begin{aligned}&\hat{m}_{\ln(|\tilde{Y}|)}(u) - m_{\ln(|\tilde{Y}|)}(u) \\ &= \frac{1}{nf_U(u)} \sum_{j=1}^n K_h(U_j - u) \left\{\ln(|\tilde{Y}_j|) - m_{\ln(|\tilde{Y}|)}(U_j)\right\}, \\ &\quad + \frac{1}{nf_U(u)} \sum_{j=1}^n K_h(U_j - u) \left\{m_{\ln(|\tilde{Y}|)}(U_j) - m_{\ln(|\tilde{Y}|)}(u)\right\} \\ &\quad + O_P\left(h^2 \sqrt{\frac{\log n}{nh}} + h^4 + \tau_{n,h}^2\right).\end{aligned}\quad (\text{A.2})$$

Using Lemma 1, we have

$$\hat{f}_U(u) = \frac{1}{nh} \sum_{i=1}^n K\left(\frac{U_i - u}{h}\right) = f_U(u) + \frac{\mu_2 h^2}{2} f_U''(u) + O_P(\tau_{n,h}), \quad (\text{A.3})$$

and

$$\begin{aligned}&\frac{1}{nf_U(u)} \sum_{j=1}^n K_h(U_j - u) \left\{m_{\ln(|\tilde{Y}|)}(U_j) - m_{\ln(|\tilde{Y}|)}(u)\right\} \\ &= \frac{h^2 \mu_2}{2f_U(u)} \left\{\left[m_{\ln(|\tilde{Y}|)}(u) f_U(u)\right]'' - m_{\ln(|\tilde{Y}|)}(u) f_U''(u)\right\} + O_P(\tau_{n,h}).\end{aligned}\quad (\text{A.4})$$

Recalling that  $m_{\ln(|\tilde{Y}|)}(u) = \ln(\phi(u)) + E(\ln(|Y|))$ , using (A.2), Taylor expansion entails that

$$\begin{aligned}&\exp\left(\ln(\phi(U_i)) - \left\{\hat{m}_{\ln(|\tilde{Y}|)}(U_i) - \overline{\ln(|\tilde{Y}|)}\right\}\right) - 1 \\ &= \left\{\overline{\ln(|\tilde{Y}|)} - E(\ln(|Y|))\right\} - \frac{1}{nf_U(U_i)} \sum_{j=1}^n K_h(U_j - U_i) \left\{\ln(|\tilde{Y}_j|) - m_{\ln(|\tilde{Y}|)}(U_j)\right\} \\ &\quad - \frac{1}{nf_U(U_i)} \sum_{j=1}^n K_h(U_j - U_i) \left\{m_{\ln(|\tilde{Y}|)}(U_j) - m_{\ln(|\tilde{Y}|)}(U_i)\right\} \\ &\quad + O_P\left(h^2 \sqrt{\frac{\log n}{nh}} + h^4 + \tau_{n,h}^2 + n^{-1}\right).\end{aligned}\quad (\text{A.5})$$

Let  $M(\cdot)$  be a function of  $\mathbf{W} = (Y, \mathbf{X})$ , such that  $E(M^2(\mathbf{W})) < \infty$ . Using (A.1) and (A.5), as  $h^2 \log n \rightarrow 0$ ,  $nh^8 \rightarrow 0$  and  $\frac{\log^2 n}{nh^2} \rightarrow 0$ , we have

$$\begin{aligned}
& \frac{1}{n} \sum_{i=1}^n (\hat{Y}_i - Y_i) M(\mathbf{W}_i) \\
&= \frac{1}{n} \sum_{i=1}^n Y_i M(\mathbf{W}_i) \left\{ \exp \left( \ln(\phi(U_i)) - \left\{ \hat{m}_{\ln(|\tilde{Y}|)}(U_i) - \overline{\ln(|\tilde{Y}|)} \right\} \right) - 1 \right\} \\
&= \frac{1}{n} \sum_{i=1}^n Y_i M(\mathbf{W}_i) \left\{ \overline{\ln(|\tilde{Y}|)} - E(\ln(|Y|)) \right\} \\
&\quad - \frac{1}{n^2} \sum_{i=1}^n \sum_{j=1}^n \frac{Y_i M(\mathbf{W}_i)}{f_U(U_i)} K_h(U_j - U_i) \left\{ \ln(|\tilde{Y}_j|) - m_{\ln(|\tilde{Y}|)}(U_j) \right\} \\
&\quad - \frac{1}{n^2} \sum_{i=1}^n \sum_{j=1}^n \frac{Y_i M(\mathbf{W}_i)}{f_U(U_i)} K_h(U_j - U_i) \left\{ m_{\ln(|\tilde{Y}|)}(U_j) - m_{\ln(|\tilde{Y}|)}(U_i) \right\} + o_P(n^{-1/2}) \\
&= \mathcal{V}_{n,1} + \mathcal{V}_{n,2} + \mathcal{V}_{n,3}.
\end{aligned} \tag{A.6}$$

For the term  $\mathcal{V}_{n,1}$ , we have

$$\begin{aligned}
\mathcal{V}_{n,1} &= \frac{1}{n} \sum_{i=1}^n Y_i M(\mathbf{W}_i) \left\{ \overline{\ln(|\tilde{Y}|)} - E(\ln(|Y|)) \right\} \\
&= \frac{E[YM(\mathbf{W})]}{n} \sum_{i=1}^n \left\{ \ln(|\tilde{Y}_i|) - E(\ln(|Y|)) \right\} + o_P(n^{-1/2}).
\end{aligned} \tag{A.7}$$

For  $\mathcal{V}_{n,2}$ , as  $nh^4 \rightarrow 0$ , the asymptotic expression of U-statistic (Serfling; 1980) entails that

$$\begin{aligned}
\mathcal{V}_{n,2} &= -\frac{E[YM(\mathbf{W})]}{n} \sum_{i=1}^n \left\{ \ln(|\tilde{Y}_i|) - m_{\ln(|\tilde{Y}|)}(U_i) \right\} + o_P(n^{-1/2}) \\
&= -\frac{E[YM(\mathbf{W})]}{n} \sum_{i=1}^n \left\{ \ln(|Y_i|) - E(\ln(|Y|)) \right\} + o_P(n^{-1/2}).
\end{aligned} \tag{A.8}$$

For  $\mathcal{V}_{n,3}$ , as  $nh^4 \rightarrow 0$ , the asymptotic expression of U-statistic (Serfling; 1980) entails that  $\mathcal{V}_{n,3} = O_P(h^2) = o_P(n^{-1/2})$ . Together with (A.6)-(A.8), we have

$$\begin{aligned}
& \frac{1}{n} \sum_{i=1}^n (\hat{Y}_i - Y_i) M(\mathbf{W}_i) \\
&= \frac{1}{n} \sum_{i=1}^n \left\{ \ln(|\tilde{Y}_i|) - \ln(|Y_i|) \right\} E(YM(\mathbf{W})) + o_P(n^{-1/2}) \\
&= \frac{1}{n} \sum_{i=1}^n \ln(\phi(U_i)) E(YM(\mathbf{W})) + o_P(n^{-1/2}).
\end{aligned} \tag{A.9}$$

Similarly, for  $r = 1, \dots, p$ , we have

$$\begin{aligned}
& \frac{1}{n} \sum_{i=1}^n (\hat{X}_{ri} - X_{ri}) M(\mathbf{W}_i) \\
&= \frac{1}{n} \sum_{i=1}^n \left\{ \ln(|\tilde{X}_{ri}|) - \ln(|X_{ri}|) \right\} E(X_r M(\mathbf{W})) + o_P(n^{-1/2}) \\
&= \frac{1}{n} \sum_{i=1}^n \ln(\psi_r(U_i)) E(X_r M(\mathbf{W})) + o_P(n^{-1/2}).
\end{aligned} \tag{A.10}$$

We complete the proof of Theorem 1.

### 2.3. Proof of Theorem 2

Recalling that

$$\begin{aligned}\hat{\beta} - \beta_0 &= \left\{ \frac{1}{n} \sum_{i=1}^n [\hat{\mathbf{X}}_i - \hat{S}_{\mathbf{X}}(Z_i)]^{\otimes 2} \right\}^{-1} \\ &\quad \times \frac{1}{n} \sum_{i=1}^n \left\{ \hat{\mathbf{X}}_i - \hat{S}_{\mathbf{X}}(Z_i) \right\} \left\{ \hat{Y}_i - \hat{S}_Y(Z_i) - \hat{\mathbf{X}}_i^T \beta_0 + \hat{S}_{\mathbf{X}}^T(Z_i) \beta_0 \right\} \\ &= \left\{ \frac{1}{n} \sum_{i=1}^n [\hat{\mathbf{X}}_i - \hat{S}_{\mathbf{X}}(Z_i)]^{\otimes 2} \right\}^{-1} [\mathbb{D}_{n1} + \mathbb{D}_{n2} + \mathbb{D}_{n3}],\end{aligned}\tag{B.1}$$

where

$$\mathbb{D}_{n1} = \frac{1}{n} \sum_{i=1}^n \left\{ \hat{\mathbf{X}}_i - \hat{S}_{\mathbf{X}}(Z_i) \right\} \epsilon_i,\tag{B.2}$$

$$\mathbb{D}_{n2} = \frac{1}{n} \sum_{i=1}^n \left\{ \hat{\mathbf{X}}_i - \hat{S}_{\mathbf{X}}(Z_i) \right\} \left\{ \hat{Y}_i - Y_i - (\hat{\mathbf{X}}_i - \mathbf{X}_i)^T \beta_0 \right\}\tag{B.3}$$

$$\begin{aligned}\mathbb{D}_{n3} &= \frac{1}{n} \sum_{i=1}^n \left\{ \hat{\mathbf{X}}_i - \hat{S}_{\mathbf{X}}(Z_i) \right\} \\ &\quad \times \left\{ S_Y(Z_i) - \hat{S}_Y(Z_i) - (S_{\mathbf{X}}(Z_i) - \hat{S}_{\mathbf{X}}(Z_i))^T \beta_0 \right\}.\end{aligned}\tag{B.4}$$

**Step 2.1** For the expression  $\mathbb{D}_{n1}$ , we have

$$\begin{aligned}\mathbb{D}_{n1} &= \frac{1}{n} \sum_{i=1}^n \left\{ \hat{\mathbf{X}}_i - \mathbf{X}_i \right\} \epsilon_i + \frac{1}{n} \sum_{i=1}^n \left\{ \mathbf{X}_i - S_{\mathbf{X}}(Z_i) \right\} \epsilon_i \\ &\quad \frac{1}{n} \sum_{i=1}^n \left\{ S_{\mathbf{X}}(Z_i) - \hat{S}_{\mathbf{X}}(Z_i) \right\} \epsilon_i \\ &\stackrel{\text{def}}{=} \mathbb{D}_{n1}[1] + \mathbb{D}_{n1}[2] + \mathbb{D}_{n1}[3].\end{aligned}\tag{B.5}$$

Recalling  $\epsilon_i = Y_i - \mathbf{X}_i^T \beta_0 - g(Z_i)$  and  $E(\epsilon_i | \mathbf{X}_i, Z_i) = 0$ . Using the asymptotic results of Theorem 1, we have

$$\begin{aligned}&\frac{1}{n} \sum_{i=1}^n \left\{ \hat{X}_{ri} - X_{ri} \right\} \epsilon_i \\ &= \frac{1}{n} \sum_{i=1}^n \ln(\psi_r(U_i)) E\{X_r[Y - \mathbf{X}^T \beta_0 - g(Z)]\} + o_P(n^{-1/2}) = o_P(n^{-1/2}).\end{aligned}\tag{B.6}$$

Based on (B.6), we have  $\mathbb{D}_{n1}[1] = o_P(n^{-1/2})$ .

**Step 2.2** In the following, we define

$$M_{n\delta, \hat{W}}^\Delta(z) = \frac{1}{nh_1} \sum_{i=1}^n \left( \frac{Z_i - z}{h_1} \right)^\delta K \left( \frac{Z_i - z}{h_1} \right) (\hat{W}_i - W_i),\tag{B.7}$$

where,  $\hat{W}_i = \hat{Y}_i$ ,  $W_i = Y_i$  and  $\hat{W}_i = \hat{X}_{ri}$ ,  $W_i = X_{ri}$  for  $\delta = 0, 1$ ,  $r = 1, \dots, p$  and  $i = 1, \dots, n$ .

For  $\delta = 0$ , similar to (A.1) and (A.5), we have

$$\begin{aligned}
M_{n0, \hat{X}_r}^\Delta(z) &= \frac{1}{nh_1} \sum_{i=1}^n K\left(\frac{Z_i - z}{h_1}\right) (\hat{X}_{ri} - X_{ri}) \\
&= \frac{1}{nh_1} \sum_{i=1}^n K\left(\frac{Z_i - z}{h_1}\right) X_{ri} \left\{ \overline{\ln(|\tilde{X}_r|)} - E(\ln(|X_r|)) \right\} \\
&\quad - \frac{1}{n^2 h_1 h} \sum_{i=1}^n \sum_{j=1}^n \frac{X_{ri}}{f_U(U_i)} K\left(\frac{Z_i - z}{h_1}\right) K\left(\frac{U_j - U_i}{h}\right) \\
&\quad \times \left\{ \ln(|\tilde{X}_{rj}|) - m_{\ln(|\tilde{X}_r|)}(U_j) \right\} \\
&\quad - \frac{1}{n^2 h_1 h} \sum_{i=1}^n \sum_{j=1}^n \frac{X_{ri}}{f_U(U_i)} K\left(\frac{Z_i - z}{h_1}\right) K\left(\frac{U_j - U_i}{h}\right) \\
&\quad \times \left\{ m_{\ln(|\tilde{Y}|)}(U_j) - m_{\ln(|\tilde{Y}|)}(U_i) \right\} \\
&\quad + O_P\left(h^2 \sqrt{\frac{\log n}{nh}} + h^4 + \tau_{n,h}^2 + n^{-1}\right).
\end{aligned} \tag{B.8}$$

Recalling that  $m_{\ln(|\tilde{X}_r|)}(u) = \ln(\psi_r(u)) + E(\ln(|X_r|))$ , the asymptotic expression of U-statistic (Serfling; 1980) entails that

$$\begin{aligned}
&\frac{1}{n^2 h_1 h} \sum_{i=1}^n \sum_{j=1}^n \frac{X_{ri}}{f_U(U_i)} K\left(\frac{Z_i - z}{h_1}\right) K\left(\frac{U_j - U_i}{h}\right) \\
&\quad \times \left\{ \ln(|\tilde{X}_{rj}|) - m_{\ln(|\tilde{X}_r|)}(U_j) \right\} \\
&= s_{X_r}(z) f_Z(z) \frac{1}{n} \sum_{i=1}^n \{ \ln(|X_{ri}|) - E(\ln(|X_r|)) \} + o_P(n^{-1/2}) + O_P(n^{-1/2} h_1^2).
\end{aligned} \tag{B.9}$$

Similar to (B.8), we have

$$\begin{aligned}
&\frac{1}{n^2 h_1 h} \sum_{i=1}^n \sum_{j=1}^n \frac{X_{ri}}{f_U(U_i)} K\left(\frac{Z_i - z}{h_1}\right) K\left(\frac{U_j - U_i}{h}\right) \\
&\quad \times \left\{ m_{\ln(|\tilde{Y}|)}(U_j) - m_{\ln(|\tilde{Y}|)}(U_i) \right\} = O_P(h^2 + h_1^2 h^2)
\end{aligned} \tag{B.10}$$

Together with (B.8)-(B.10), as  $nh^4 \rightarrow 0$ ,  $\frac{\log n}{nh_1} \rightarrow 0$ , we have

$$\begin{aligned}
M_{n0, \hat{X}_r}^\Delta(z) &= \frac{1}{nh_1} \sum_{i=1}^n K\left(\frac{Z_i - z}{h_1}\right) X_{ri} \left\{ \overline{\ln(|\tilde{X}_r|)} - E(\ln(|X_r|)) \right\} \\
&\quad - s_{X_r}(z) f_Z(z) \frac{1}{n} \sum_{i=1}^n \{ \ln(|X_{ri}|) - E(\ln(|X_r|)) \} \\
&\quad + O_P\left(h^2 + h_1^2 h^2 + h^2 \sqrt{\frac{\log n}{nh}} + h^4 + \tau_{n,h}^2 + n^{-1}\right) \\
&= s_{X_r}(z) f_Z(z) \frac{1}{n} \sum_{i=1}^n \ln(\psi_r(U_i)) + o_P(n^{-1/2}).
\end{aligned} \tag{B.11}$$

Similar to (B.11), we have

$$M_{n1, \hat{X}_r}^\Delta(z) = h_1 [s_{X_r}(z) f_Z(z)]' \frac{1}{n} \sum_{i=1}^n \ln(\psi_r(U_i)) + o_P(n^{-1/2}). \tag{B.12}$$

Thus, using Lemma 1 and (B.12), we have

$$\begin{aligned}\hat{s}_{X_r}(z) &= \frac{Q_{n2}(z)M_{n0,\hat{X}_r}(z) - Q_{n1}(z)M_{n1,X_r}(z)}{Q_{n2}(z)Q_{n0}(z) - [Q_{n1}(z)]^2} \\ &\quad + \frac{Q_{n2}(z)M_{n0,\hat{X}_r}^\Delta(z) - Q_{n1}(z)M_{n1,\hat{X}_r}^\Delta(z)}{Q_{n2}(z)Q_{n0}(z) - [Q_{n1}(z)]^2} \\ &\stackrel{\text{def}}{=} \hat{s}_{X_r}^*(z) + s_{X_r}(z) \frac{1}{n} \sum_{i=1}^n \ln(\psi_r(U_i)) + o_P(n^{-1/2}).\end{aligned}\tag{B.13}$$

Directly using Lemma A.1 in Liang and Li (2009) and similar to the proof of Theorem 1 in Liang and Li (2009), we have

$$\begin{aligned}\frac{1}{n} \sum_{i=1}^n \left\{ S_{\mathbf{X}}(Z_i) - \hat{S}_{\mathbf{X}}^*(Z_i) \right\} \epsilon_i &= o_P(n^{-1/2}) \\ \text{where, } \hat{S}_{\mathbf{X}}^*(Z_i) &= (\hat{s}_{X_1}^*(Z_i), \dots, \hat{s}_{X_r}^*(Z_i))^T.\end{aligned}\tag{B.14}$$

Appealing to (B.13)-(B.14), we obtain

$$\begin{aligned}\mathbb{D}_{n1}[3] &= \frac{1}{n} \sum_{i=1}^n \left\{ S_{\mathbf{X}}(Z_i) - \hat{S}_{\mathbf{X}}^*(Z_i) \right\} \epsilon_i - \frac{1}{n} \sum_{i=1}^n S_{\mathbf{X}}(Z_i) \epsilon_i \left\{ \frac{1}{n} \sum_{i=1}^n \ln(\psi_r(U_i)) \right\} \\ &\quad + o_P(n^{-1/2}) = O_P(n^{-1}) + o_P(n^{-1/2}) = o_P(n^{-1/2}).\end{aligned}\tag{B.15}$$

Thus, according to (B.5)-(B.6) and (B.15), we obtain that

$$\mathbb{D}_{n1} = \frac{1}{n} \sum_{i=1}^n \{ \mathbf{X}_i - S_{\mathbf{X}}(Z_i) \} \epsilon_i + o_P(n^{-1/2}).\tag{B.16}$$

**Step 2.3** For the argument  $\mathbb{D}_{n2}$ , we have

$$\begin{aligned}\mathbb{D}_{n2} &= \frac{1}{n} \sum_{i=1}^n \left\{ \hat{\mathbf{X}}_i - \mathbf{X}_i \right\} \left\{ \hat{Y}_i - Y_i - (\hat{\mathbf{X}}_i - \mathbf{X}_i)^T \boldsymbol{\beta}_0 \right\} \\ &\quad + \frac{1}{n} \sum_{i=1}^n \left\{ \mathbf{X}_i - S_{\mathbf{X}}(Z_i) \right\} \left\{ \hat{Y}_i - Y_i - (\hat{\mathbf{X}}_i - \mathbf{X}_i)^T \boldsymbol{\beta}_0 \right\} \\ &\quad + \frac{1}{n} \sum_{i=1}^n \left\{ S_{\mathbf{X}}(Z_i) - \hat{S}_{\mathbf{X}}(Z_i) \right\} \left\{ \hat{Y}_i - Y_i - (\hat{\mathbf{X}}_i - \mathbf{X}_i)^T \boldsymbol{\beta}_0 \right\} \\ &\stackrel{\text{def}}{=} \mathbb{D}_{n2}[1] + \mathbb{D}_{n2}[2] + \mathbb{D}_{n2}[3].\end{aligned}\tag{B.17}$$

Let  $\hat{V}_i = \hat{Y}_i$ , or  $\hat{V}_i = \hat{X}_{ri}$ , and  $\hat{D}_i = \hat{Y}_i$ , or  $\hat{D}_i = \hat{X}_{ri}$ , accordingly,  $V_i = Y_i$ , or  $V_i = X_{ri}$  or  $V_i = Z_i$ , and  $D_i = Y_i$ , or  $D_i = X_{ri}$  or  $D_i = Z_i$ . Based on (A.5), as  $nh^8 \rightarrow 0$  and  $\frac{\log^2 n}{nh^2} \rightarrow 0$ , we have

$$\frac{1}{n} \sum_{i=1}^n (\hat{V}_i - V_i)(\hat{D}_i - D_i) = O_P((n^{-1/2} + h^2 + \tau_{n,h})^2) = o_P(n^{-1/2}).\tag{B.18}$$

Using (B.18), we have  $\mathbb{D}_{n2}[1] = o_P(n^{-1/2})$ . For  $\mathbb{D}_{n2}[2]$ , using  $E[\mathbf{X} - S_{\mathbf{X}}(Z)|Z] = 0$ , and

$\text{Cov}(Y, \mathbf{X} - S_{\mathbf{X}}(Z)) = \boldsymbol{\Sigma}_0 \boldsymbol{\beta}_0$ , Theorem 1 entails that

$$\begin{aligned}
& \frac{1}{n} \sum_{i=1}^n \{\mathbf{X}_i - S_{\mathbf{X}}(Z_i)\} \{\hat{Y}_i - Y_i\} \\
&= \frac{1}{n} \sum_{i=1}^n \ln(\phi(U_i)) E[Y(\mathbf{X}_i - S_{\mathbf{X}}(Z))] + o_P(n^{-1/2}) \\
&= \frac{1}{n} \sum_{i=1}^n \ln(\phi(U_i)) \text{Cov}(Y, \mathbf{X} - S_{\mathbf{X}}(Z)) + o_P(n^{-1/2}) \\
&= \frac{1}{n} \sum_{i=1}^n \ln(\phi(U_i)) \boldsymbol{\Sigma}_0 \boldsymbol{\beta}_0 + o_P(n^{-1/2}).
\end{aligned} \tag{B.19}$$

Similarly, we have

$$\begin{aligned}
& \frac{1}{n} \sum_{i=1}^n \{\mathbf{X}_i - S_{\mathbf{X}}(Z_i)\} (\hat{\mathbf{X}}_i - \mathbf{X}_i)^T \boldsymbol{\beta}_0 \\
&= \sum_{r=1}^p \left\{ \frac{1}{n} \sum_{i=1}^n \{\mathbf{X}_i - S_{\mathbf{X}}(Z_i)\} (\hat{X}_{ri} - X_{ri}) \beta_{0r} \right\} \\
&= \frac{1}{n} \sum_{r=1}^p \sum_{i=1}^n \ln(\psi_r(U_i)) E[X_r(\mathbf{X}_i - S_{\mathbf{X}}(Z))] \beta_{0r} + o_P(n^{-1/2}) \\
&= \frac{1}{n} \sum_{r=1}^p \sum_{i=1}^n \ln(\psi_r(U_i)) E[(\mathbf{X}_i - S_{\mathbf{X}}(Z))^{\otimes 2}] \mathbf{e}_r \mathbf{e}_r^T \boldsymbol{\beta}_0 + o_P(n^{-1/2}). \\
&= \frac{1}{n} \sum_{r=1}^p \sum_{i=1}^n \ln(\psi_r(U_i)) \boldsymbol{\Sigma}_0 \mathbf{e}_r \mathbf{e}_r^T \boldsymbol{\beta}_0 + o_P(n^{-1/2}).
\end{aligned} \tag{B.20}$$

Together with (B.19) and (B.20), we have

$$\begin{aligned}
\mathbb{D}_{n2}[2] &= \frac{1}{n} \sum_{i=1}^n \ln(\phi(U_i)) \boldsymbol{\Sigma}_0 \boldsymbol{\beta}_0 \\
&\quad - \frac{1}{n} \sum_{r=1}^p \sum_{i=1}^n \ln(\psi_r(U_i)) \boldsymbol{\Sigma}_0 \mathbf{e}_r \mathbf{e}_r^T \boldsymbol{\beta}_0 + o_P(n^{-1/2}).
\end{aligned} \tag{B.21}$$

Under the condition  $nh_1^8 \rightarrow 0$  and  $\frac{\log n}{nh_1^2} \rightarrow 0$ , the conclusion of (A.1) in Liang and Li (2009) entails that  $\sup_{z \in \mathcal{Z}} |\hat{s}_{X_r}^*(z) - s_{X_r}(z)| = o_P(n^{-1/4})$ ,  $r = 1, \dots, p$ .

According to the proof of Theorem 1 in Zhang et al. (2016), using (B.13), we have

$$\begin{aligned}
& \frac{1}{n} \sum_{i=1}^n \{s_{X_l}(Z_i) - \hat{s}_{X_l}(Z_i)\} (\hat{X}_{ri} - X_{ri}) \\
&= \frac{1}{n} \sum_{i=1}^n \left\{ s_{X_l}(Z_i) - \hat{s}_{X_l}^*(Z_i) - s_{X_l}(Z_i) \frac{1}{n} \sum_{i=1}^n \psi_l(U_i) \right\} (\hat{X}_{ri} - X_{ri}) + o_P(n^{-1/2}) \\
&= O_P(n^{-1/2} h_1^2 + n^{-1}) + o_P(n^{-1/2}) = o_P(n^{-1/2}).
\end{aligned} \tag{B.22}$$

Similar to (B.22),  $\mathbb{D}_{n2}[3] = o_P(n^{-1/2})$ , and also  $\mathbb{D}_{n3} = o_P(n^{-1/2})$ . Moreover,

$$\frac{1}{n} \sum_{i=1}^n [\hat{\mathbf{X}}_i - \hat{S}_{\mathbf{X}}(Z_i)]^{\otimes 2} \xrightarrow{P} \boldsymbol{\Sigma}_0. \tag{B.23}$$

Thus, together with (B.16), (B.21) and (B.23), we obtain that

$$\begin{aligned}\hat{\beta} - \beta_0 &= \Sigma_0^{-1}(\mathbb{D}_{n1} + \mathbb{D}_{n2} + \mathbb{D}_{n3}) + o_P(n^{-1/2}) \\ &= \frac{1}{n} \sum_{i=1}^n \Sigma_0^{-1} \{ \mathbf{X}_i - S_{\mathbf{X}}(Z_i) \} \epsilon_i \\ &\quad + \frac{1}{n} \sum_{i=1}^n \left\{ \ln(\phi(U_i)) - \sum_{r=1}^p \ln(\psi_r(U_i)) \mathbf{e}_r \mathbf{e}_r^T \right\} \beta_0 + o_P(n^{-1/2}).\end{aligned}\tag{B.24}$$

We have completed the proof of Theorem 2.

#### 2.4. Proof of Theorem 3

Note that

$$\begin{aligned}\hat{g}(z) - g(z) &= \frac{T_{n2}(z)\hat{V}_{n0}(z) - T_{n1}(z)\hat{V}_{n1}(z)}{T_{n2}(z)T_{n0}(z) - [T_{n1}(z)]^2} - g(z) \\ &= \frac{T_{n2}(z)[\hat{V}_{n0}(z) - T_{n0}(z)g(z)]}{T_{n2}(z)T_{n0}(z) - [T_{n1}(z)]^2} - \frac{T_{n1}(z)[\hat{V}_{n1}(z) - T_{n1}(z)g(z)]}{T_{n2}(z)T_{n0}(z) - [T_{n1}(z)]^2} \\ &= S_{n1}(z) - S_{n2}(z)\end{aligned}\tag{C.1}$$

For the term  $S_{n1}(z)$ , we have

$$\begin{aligned}S_{n1}(z) &= \frac{1}{T_{n0}(z) - [T_{n1}(z)]^2 / T_{n2}(z)} \frac{1}{nh_2} \sum_{i=1}^n K\left(\frac{Z_i - z}{h_2}\right) \epsilon_i \\ &\quad + \frac{1}{T_{n0}(z) - [T_{n1}(z)]^2 / T_{n2}(z)} \frac{1}{nh_2} \sum_{i=1}^n K\left(\frac{Z_i - z}{h_2}\right) (g(Z_i) - g(z)) \\ &\quad + \frac{1}{T_{n0}(z) - [T_{n1}(z)]^2 / T_{n2}(z)} \frac{1}{nh_2} \sum_{i=1}^n K\left(\frac{Z_i - z}{h_2}\right) \mathbf{X}_i^T (\beta_0 - \hat{\beta}) \\ &\quad + \frac{1}{T_{n0}(z) - [T_{n1}(z)]^2 / T_{n2}(z)} \frac{1}{nh_2} \sum_{i=1}^n K\left(\frac{Z_i - z}{h_2}\right) (\hat{Y}_i - Y_i - (\hat{\mathbf{X}}_i - \mathbf{X}_i)^T \hat{\beta}) \\ &\stackrel{\text{def}}{=} S_{n1,[1]}(z) + S_{n1,[2]}(z) + S_{n1,[3]}(z) + S_{n1,[4]}(z).\end{aligned}\tag{C.2}$$

Directly using Lemma 1, we have

$$S_{n1,[1]}(z) = \frac{1}{nh_2 f_Z(z)} \sum_{i=1}^n K\left(\frac{Z_i - z}{h_2}\right) \epsilon_i + O_P\left(h_2^2 \sqrt{\frac{\log n}{nh_2}} + \frac{\log n}{nh_2}\right),\tag{C.3}$$

$$S_{n1,[2]}(z) = \frac{h_2^2 \mu_2}{2} g''(z) + h_2^2 \mu_2 \frac{g'(z) f_Z'(z)}{f_Z(z)} + O_P\left(h_2^4 + \frac{\log n}{nh_2}\right).\tag{C.4}$$

By using Theorem 2, we obtain that  $\hat{\beta} - \beta_0 = O_P(n^{-1/2})$ , and we can have that

$$S_{n1,[3]}(z) = O_P(n^{-1/2}) = o_P((nh_2)^{-1/2}).\tag{C.5}$$

Using (A.1) and (A.5), similar to (B.8), we have

$$\begin{aligned}S_{n1,[4]}(z) &= s_Y(z) \frac{1}{n} \sum_{i=1}^n \ln(\phi(U_i)) \\ &\quad - \frac{1}{n} \sum_{i=1}^n \sum_{r=1}^p s_{X_r}(z) \beta_{0r} \ln(\psi_r(U_i)) + o_P(n^{-1/2}) \\ &= O_P(n^{-1/2}) = o_P((nh_2)^{-1/2}).\end{aligned}\tag{C.6}$$



Similar to the analysis of (C.2)-(C.6), we have

$$S_{n2}(z) = \frac{g'(z)f_Z'(z)}{f_Z(z)}h_2^2\mu_2 + o_P(h_2^2 + 1/\sqrt{nh_2}). \quad (\text{C.7})$$

Together with (C.2) and (C.7), we have

$$\begin{aligned} \hat{g}(z) - g(z) - \frac{\mu_2 h_2^2}{2} g''(z) \\ = \frac{1}{f_Z(z)nh_2} \sum_{i=1}^n K\left(\frac{Z_i - z}{h_2}\right) \epsilon_i + o_P(h_2^2 + 1/\sqrt{nh_2}). \end{aligned} \quad (\text{C.8})$$

The asymptotic result of Theorem is directly obtained from (C.8), we have completed the proof of Theorem 3.

### 2.5. Proof of Theorem 4

We first consider the conditional mean calibration. For  $1 \leq r \leq p$ , let  $\hat{\phi}_{n,i}^{[r]}(\beta_0)$  be the  $r$ -component of  $\hat{\phi}_{n,i}(\beta_0)$ . We decompose  $\hat{\phi}_{n,i}^{[r]}(\beta_0)$  into following terms:

$$\hat{\phi}_{n,i}^{[r]}(\beta_0) = (Y_i - S_Y(Z_i) - [\mathbf{X}_i - S_{\mathbf{X}}(Z_i)]^T \beta_0)[X_{ri} - s_{X_r}(Z_i)] + \sum_{t=1}^8 R_{n,it}^{[r]},$$

where,

$$\begin{aligned} R_{n,i1}^{[r]} &= \{\hat{Y}_i - Y_i - [\hat{\mathbf{X}}_i - \mathbf{X}_i]^T \beta_0\}[X_{ri} - s_{X_r}(Z_i)], \\ R_{n,i2}^{[r]} &= \{\hat{Y}_i - Y_i - [\hat{\mathbf{X}}_i - \mathbf{X}_i]^T \beta_0\}[\hat{X}_{ri} - X_{ri}], \\ R_{n,i3}^{[r]} &= \{\hat{Y}_i - Y_i - [\hat{\mathbf{X}}_i - \mathbf{X}_i]^T \beta_0\}[s_{X_r}(Z_i) - \hat{s}_{X_r}(Z_i)], \\ R_{n,i4}^{[r]} &= \{Y_i - S_Y(Z_i) - [\mathbf{X}_i - S_{\mathbf{X}}(Z_i)]^T \beta_0\}[s_{X_r}(Z_i) - \hat{s}_{X_r}(Z_i)], \\ R_{n,i5}^{[r]} &= \{Y_i - S_Y(Z_i) - [\mathbf{X}_i - S_{\mathbf{X}}(Z_i)]^T \beta_0\}[\hat{X}_{ri} - X_{ri}], \\ R_{n,i6}^{[r]} &= \{S_Y(Z_i) - \hat{S}_Y(Z_i) - [S_{\mathbf{X}}(Z_i) - \hat{S}_{\mathbf{X}}(Z_i)]^T \beta_0\}[s_{X_r}(Z_i) - \hat{s}_{X_r}(Z_i)], \\ R_{n,i7}^{[r]} &= \{S_Y(Z_i) - \hat{S}_Y(Z_i) - [S_{\mathbf{X}}(Z_i) - \hat{S}_{\mathbf{X}}(Z_i)]^T \beta_0\}[\hat{X}_{ri} - X_{ri}], \\ R_{n,i8}^{[r]} &= \{S_Y(Z_i) - \hat{S}_Y(Z_i) - [S_{\mathbf{X}}(Z_i) - \hat{S}_{\mathbf{X}}(Z_i)]^T \beta_0\}[X_{ri} - s_{X_r}(Z_i)]. \end{aligned}$$

To prove Theorem 4, we need to show that

$$\max_{1 \leq i \leq n} |\hat{\phi}_{n,it}^{[r]}| = o_P(n^{1/2}), \quad t = 1, \dots, 8.$$

It is noted that for any sequence of *i.i.d* random  $\{V_i, 1 \leq i \leq n\}$  and  $E[V^2] < \infty$ , we have

$$\max_{1 \leq i \leq n} \frac{|V_i|}{\sqrt{n}} \rightarrow 0, \text{ a.s.. Then,}$$

$$\max_{1 \leq i \leq n} \left| (Y_i - S_Y(Z_i) - [\mathbf{X}_i - S_{\mathbf{X}}(Z_i)]^T \beta_0)[X_{ri} - s_{X_r}(Z_i)] \right| = o_P(n^{1/2}).$$

Next, for  $R_{n,i1}^{[r]}$ , according to (A.1) and (A.5),

$$\begin{aligned}
& \max_{1 \leq i \leq n} |\{\hat{Y}_i - Y_i\}[X_{ri} - s_{X_r}(Z_i)]| \\
& \leq \max_{1 \leq i \leq n} \left| \left\{ \exp \left( \ln(\phi(U_i)) - \left\{ \hat{m}_{\ln(|\tilde{Y}|)}(U_i) - \overline{\ln(|\tilde{Y}|)} \right\} \right) - 1 \right\} \right| \\
& \quad \times |Y_i[X_{ri} - s_{X_r}(Z_i)]| \\
& \leq \max_{1 \leq i \leq n} |Y_i[X_{ri} - s_{X_r}(Z_i)]| \left| \overline{\ln(|\tilde{Y}|)} - E(\ln(|Y|)) \right| \\
& \quad + \max_{1 \leq i \leq n} |Y_i[X_{ri} - s_{X_r}(Z_i)]| O_P \left( h^2 + \sqrt{\frac{\log n}{nh}} \right) + O_P \left( h^4 + \frac{\log n}{nh} \right) O_P(n^{1/2}) \\
& = o_P(n^{1/2}).
\end{aligned} \tag{D.1}$$

Similar to (D.1), we have

$$\max_{1 \leq i \leq n} |R_{n,i1}^{[r]}| = o_P(n^{1/2}), \quad \max_{1 \leq i \leq n} |R_{n,i5}^{[r]}| = o_P(n^{1/2}). \tag{D.2}$$

For  $R_{n,i2}^{[r]}$ , similar to (D.1), we have

$$\begin{aligned}
& \max_{1 \leq i \leq n} |\{\hat{Y}_i - Y_i\}[\hat{X}_{ri} - X_{ri}]| \\
& \leq \max_{1 \leq i \leq n} |Y_i X_{ri}| \max_{1 \leq i \leq n} \left| \left\{ \exp \left( \ln(\phi(U_i)) - \left\{ \hat{m}_{\ln(|\tilde{Y}|)}(U_i) - \overline{\ln(|\tilde{Y}|)} \right\} \right) - 1 \right\} \right| \\
& \quad \times \max_{1 \leq i \leq n} \left| \left\{ \exp \left( \ln(\psi_r(U_i)) - \left\{ \hat{m}_{\ln(|\tilde{X}_r|)}(U_i) - \overline{\ln(|\tilde{X}_r|)} \right\} \right) - 1 \right\} \right| \\
& = O_P \left( h^4 + \frac{\log n}{nh} + n^{-1} \right) O_P(n^{1/2}) = o_P(n^{1/2})
\end{aligned} \tag{D.3}$$

Thus, according to (D.3), we show that

$$\max_{1 \leq i \leq n} |R_{n,i2}^{[r]}| = o_P(n^{1/2}). \tag{D.4}$$

The conclusion of (A.1) in Liang and Li (2009) entails that  $\sup_{z \in \mathcal{Z}} |\hat{S}_Y^*(z) - S_Y(z)| = o_P(n^{-1/4})$ , and  $\sup_{z \in \mathcal{Z}} |\hat{s}_{X_r}^*(z) - s_{X_r}(z)| = o_P(n^{-1/4})$ ,  $r = 1, \dots, p$ . Similar to (B.22), we have

$$\begin{aligned}
& \max_{1 \leq i \leq n} |\{\hat{Y}_i - Y_i\}[s_{X_r}(Z_i) - \hat{s}_{X_r}(Z_i)]| \\
& \leq \max_{1 \leq i \leq n} |Y_i| \max_{1 \leq i \leq n} |s_{X_r}(Z_i) - \hat{s}_{X_r}(Z_i)| \\
& \quad \times \max_{1 \leq i \leq n} \left| \left\{ \exp \left( \ln(\phi(U_i)) - \left\{ \hat{m}_{\ln(|\tilde{Y}|)}(U_i) - \overline{\ln(|\tilde{Y}|)} \right\} \right) - 1 \right\} \right| = o_P(n^{1/2}).
\end{aligned} \tag{D.5}$$

Similar to (D.5), we show that

$$\max_{1 \leq i \leq n} |R_{n,i3}^{[r]}| = o_P(n^{1/2}). \tag{D.6}$$

Similar to the proofs of  $|R_{n,it}^{[r]}|$ ,  $t = 1, 2, 3, 5$ , we have  $\max_{1 \leq i \leq n} |R_{n,it}^{[r]}| = o_P(n^{1/2})$  for  $t = 4, 6, 7, 8$ . We omit the details. Followed the same argument in the proof (2.14) in Owen (1991), we have  $\hat{\lambda} = O_P(n^{1/2})$ . Thus,  $\max_{1 \leq i \leq n} |\hat{\lambda}^\top \hat{\phi}_{n,i}(\beta_0)| = o_P(1)$ . Note that  $\log(1+t) \approx t - \frac{1}{2}t^2$  for  $t$  sufficiently small, we have

$$\hat{l}(\beta_0) = 2 \sum_{i=1}^n \left( \hat{\lambda}^\top \hat{\phi}_{n,i}(\beta_0) - \frac{1}{2} \{ \hat{\lambda}^\top \hat{\phi}_{n,i}(\beta_0) \}^2 \right) + o_P(1). \tag{D.7}$$

Note that  $\hat{\lambda}$  satisfies the following equation,

$$\frac{1}{n} \sum_{i=1}^n \frac{\hat{\phi}_{n,i}(\beta_0)}{1 + \hat{\lambda}^T \hat{\phi}_{n,i}(\beta_0)} = \mathbf{0}.$$

Further,

$$\begin{aligned} \mathbf{0} &= \frac{1}{n} \sum_{i=1}^n \frac{\hat{\phi}_{n,i}(\beta_0)}{1 + \hat{\lambda}^T \hat{\phi}_{n,i}(\beta_0)} \frac{1}{n} \sum_{i=1}^n \hat{\phi}_{n,i}(\beta_0) - \frac{1}{n} \sum_{i=1}^n \hat{\phi}_{n,i}(\beta_0) \hat{\phi}_{n,i}(\beta_0)^T \hat{\lambda} \\ &\quad + \frac{1}{n} \sum_{i=1}^n \frac{\hat{\phi}_{n,i}(\beta_0) \{\hat{\lambda}^T \hat{\phi}_{n,i}(\beta_0)\}^2}{1 + \hat{\lambda}^T \hat{\phi}_{n,i}(\beta_0)}. \end{aligned} \quad (\text{D.8})$$

Above equation (D.8) and  $\max_{1 \leq i \leq n} |\hat{\lambda}^T \hat{\phi}_{n,i}(\beta_0)| = o_P(1)$  entail that

$$\hat{\lambda} = \left( \frac{1}{n} \sum_{i=1}^n \hat{\phi}_{n,i}(\beta_0) \hat{\phi}_{n,i}(\beta_0)^T \right)^{-1} \frac{1}{n} \sum_{i=1}^n \hat{\phi}_{n,i}(\beta_0) + o_P(n^{-1/2}). \quad (\text{D.9})$$

Plugging the asymptotic expressions (D.7)-(D.9), we have

$$\begin{aligned} \hat{l}(\beta_0) &= n \left( \frac{1}{n} \sum_{i=1}^n \hat{\phi}_{n,i}(\beta_0) \right)^T \left( \frac{1}{n} \sum_{i=1}^n \hat{\phi}_{n,i}(\beta_0) \hat{\phi}_{n,i}(\beta_0)^T \right)^{-1} \left( \frac{1}{n} \sum_{i=1}^n \hat{\phi}_{n,i}(\beta_0) \right) \\ &\quad + o_P(1). \end{aligned} \quad (\text{D.10})$$

According the proof Theorem 2, we can obtain that

$$\hat{l}(\beta_0) = n \left( \frac{1}{n} \sum_{i=1}^n \kappa_{n,i}(\beta_0) \right)^T \left( \frac{1}{n} \sum_{i=1}^n \kappa_{n,i}(\beta_0) \kappa_{n,i}(\beta_0)^T \right)^{-1} \left( \frac{1}{n} \sum_{i=1}^n \kappa_{n,i}(\beta_0) \right) + o_P(1),$$

where  $\kappa_{n,i}(\beta_0) = \{Y_i - S_Y(Z_i) - [\mathbf{X}_i - S_{\mathbf{X}}(Z_i)]^T \beta_0\} [\mathbf{X}_i - S_{\mathbf{X}}(Z_i)]$  is independent and identically distributed  $p$ -dimensional random vector with zero mean. Theorem 4 for  $\hat{l}(\beta_0)$  follows from the central limit theorem and the Slutsky theorem.

### 3. PROOF OF THEOREM 5 AND THEOREM 6

**Step 1** Note that

$$\hat{\beta}_R = \hat{\beta} - \hat{\Sigma}^{-1} \mathbf{A}^T \left\{ \mathbf{A} \hat{\Sigma}^{-1} \mathbf{A}^T \right\}^{-1} \left[ \mathbf{A} \hat{\beta} - \mathbf{b} \right]. \quad (\text{E.1})$$

Under the null hypothesis  $\mathcal{H}_0$ , we have  $\mathbf{A} \beta_0 = \mathbf{b}$ . Using (E.1), it is seen that

$$\begin{aligned} \hat{\beta}_R - \beta_0 &= \left( \hat{\beta} - \beta_0 \right) - \hat{\Sigma}^{-1} \mathbf{A}^T \left\{ \mathbf{A} \hat{\Sigma}^{-1} \mathbf{A}^T \right\}^{-1} \left[ \mathbf{A} \hat{\beta} - \mathbf{A} \beta_0 \right] \\ &= \left[ \mathbf{I}_p - \hat{\Sigma}^{-1} \mathbf{A}^T \left\{ \mathbf{A} \hat{\Sigma}^{-1} \mathbf{A}^T \right\}^{-1} \mathbf{A} \right] \left( \hat{\beta} - \beta_0 \right). \end{aligned} \quad (\text{E.2})$$

Together with (B.23) and (B.24), the equation (E.2) can be expressed as

$$\hat{\beta}_R - \beta_0 = \left[ \mathbf{I}_p - \Sigma_0^{-1} \mathbf{A}^T \left\{ \mathbf{A} \Sigma_0^{-1} \mathbf{A}^T \right\}^{-1} \mathbf{A} \right] \left( \hat{\beta} - \beta_0 \right) + o_P(n^{-1/2}). \quad (\text{E.3})$$

Define  $\Omega_{\mathbf{A}} = \mathbf{I}_p - \Sigma_0^{-1} \mathbf{A}^T \left\{ \mathbf{A} \Sigma_0^{-1} \mathbf{A}^T \right\}^{-1} \mathbf{A}$ , the expression (E.3) entails that

$$\sqrt{n} \left( \hat{\beta}_R - \beta_0 \right) \xrightarrow{L} N(\mathbf{0}, \Omega_{\mathbf{A}} \Sigma_0^{-1} \Sigma_{0\epsilon} \Sigma_0^{-1} \Omega_{\mathbf{A}}^T + \Omega_{\mathbf{A}} \Sigma_{\phi, \psi} \Omega_{\mathbf{A}}^T).$$

We have completed the proof of Theorem 5.

**Step 2** Under the null hypothesis  $\mathcal{H}_0 : \mathbf{A}\beta_0 = \mathbf{b}$ , using (B.24) and Theorem 1, we have

$$\begin{aligned} \sqrt{n} \left( \mathbf{A}\hat{\beta} - \mathbf{b} \right) &= \sqrt{n} \mathbf{A} \left( \hat{\beta} - \beta_0 \right) \\ &\xrightarrow{L} N \left( \mathbf{0}, \mathbf{A}\Sigma_0^{-1} \Sigma_{0\epsilon} \Sigma_0^{-1} \mathbf{A}^T + \mathbf{A}\Sigma_{\phi, \psi} \mathbf{A}^T \right). \end{aligned} \quad (\text{E.4})$$

Similar to the analysis of (B.23), we have

$$\mathbf{A}\hat{\Sigma}^{-1} \hat{\Sigma}_\epsilon \hat{\Sigma}^{-1} \mathbf{A}^T + \mathbf{A}\hat{\Sigma}_{\phi, \psi} \mathbf{A}^T \xrightarrow{P} \mathbf{A}\Sigma_0^{-1} \Sigma_{0\epsilon} \Sigma_0^{-1} \mathbf{A}^T + \mathbf{A}\Sigma_{\phi, \psi} \mathbf{A}^T. \quad (\text{E.5})$$

The Slutsky theorem entails that

$$\begin{aligned} &\left[ \mathbf{A}\hat{\Sigma}^{-1} \hat{\Sigma}_\epsilon \hat{\Sigma}^{-1} \mathbf{A}^T + \mathbf{A}\hat{\Sigma}_{\phi, \psi} \mathbf{A}^T \right]^{-1/2} \left[ \sqrt{n} \left( \mathbf{A}\hat{\beta} - \mathbf{b} \right) \right] \\ &\xrightarrow{L} N(\mathbf{0}, \mathbf{I}_k), \end{aligned} \quad (\text{E.6})$$

where  $\mathbf{I}_k$  is a  $k \times k$  dimensional identity matrix. Using (E.6), the continuous mapping theorem entails that

$$\begin{aligned} \mathcal{T}_n &= n \left( \mathbf{A}\hat{\beta} - \mathbf{b} \right)^T \left[ \mathbf{A}\hat{\Sigma}^{-1} \hat{\Sigma}_\epsilon \hat{\Sigma}^{-1} \mathbf{A}^T + \mathbf{A}\hat{\Sigma}_{\phi, \psi} \mathbf{A}^T \right]^{-1} \left( \mathbf{A}\hat{\beta} - \mathbf{b} \right) \\ &\xrightarrow{L} \chi_k^2, \end{aligned} \quad (\text{E.7})$$

where  $\chi_k^2$  is the centered chi-squared distribution with degree of freedom  $k$ . We have completed the proof of Theorem 6.

#### 4. PROOF OF THEOREM 7

**Step 1** It is noted that  $\mathbf{b} = \mathbf{A}\beta_0 - n^{-1/2} \mathbf{c}$  under the null hypothesis  $\mathcal{H}_{1n}$ , from (E.1) and we have

$$\begin{aligned} \hat{\beta}_R &= \hat{\beta} - \hat{\Sigma}^{-1} \mathbf{A}^T \left\{ \mathbf{A}\hat{\Sigma}^{-1} \mathbf{A}^T \right\}^{-1} \left[ \mathbf{A}\hat{\beta} - \mathbf{b} \right] \\ &= \hat{\beta} - \hat{\Sigma}^{-1} \mathbf{A}^T \left\{ \mathbf{A}\hat{\Sigma}^{-1} \mathbf{A}^T \right\}^{-1} \left[ \mathbf{A}\hat{\beta} - \mathbf{A}\beta_0 + n^{-1/2} \mathbf{c} \right] \\ &= \hat{\beta} - \hat{\Sigma}^{-1} \mathbf{A}^T \left\{ \mathbf{A}\hat{\Sigma}^{-1} \mathbf{A}^T \right\}^{-1} \mathbf{A} \left( \hat{\beta} - \beta_0 \right) \\ &\quad - n^{-1/2} \hat{\Sigma}^{-1} \mathbf{A}^T \left\{ \mathbf{A}\hat{\Sigma}^{-1} \mathbf{A}^T \right\}^{-1} \mathbf{c}. \end{aligned} \quad (\text{F.1})$$

Using (E.2)-(E.3) and (F.1), we have

$$\hat{\beta}_R - \beta_0 = \Omega_A \left( \hat{\beta} - \beta_0 \right) - n^{-1/2} \Sigma_0^{-1} \mathbf{A}^T \left\{ \mathbf{A}\Sigma_0^{-1} \mathbf{A}^T \right\}^{-1} \mathbf{c} + o_P(n^{-1/2}). \quad (\text{F.2})$$

According to Theorem 1, we have

$$\begin{aligned} &\sqrt{n} \left( \hat{\beta}_R - \beta_0 \right) \\ &\xrightarrow{L} N \left( -\Sigma_0^{-1} \mathbf{A}^T \left\{ \mathbf{A}\Sigma_0^{-1} \mathbf{A}^T \right\}^{-1} \mathbf{c}, \Omega_A \Sigma_0^{-1} \Sigma_\epsilon \Sigma_0^{-1} \Omega_A^T + \Omega_A \Sigma_{\phi, \psi} \Omega_A^T \right). \end{aligned} \quad (\text{F.3})$$

**Step 2** Under the local alternative hypothesis  $\mathcal{H}_{1n} : \mathbf{A}\beta_0 = \mathbf{b} + n^{-1/2} \mathbf{c}$ , using Theorem 1, we have

$$\begin{aligned} \sqrt{n} \left( \mathbf{A}\hat{\beta} - \mathbf{b} \right) &= \sqrt{n} \left( \mathbf{A}\hat{\beta} - \mathbf{A}\beta_0 + n^{-1/2} \mathbf{c} \right) \\ &= \sqrt{n} \mathbf{A} \left( \hat{\beta} - \beta_0 \right) + \mathbf{c} \\ &\xrightarrow{L} N \left( \mathbf{c}, \mathbf{A}\Sigma_0^{-1} \Sigma_{0\epsilon} \Sigma_0^{-1} \mathbf{A}^T + \mathbf{A}\Sigma_{\phi, \psi} \mathbf{A}^T \right). \end{aligned} \quad (\text{F.4})$$

Using (E.5)-(E.6) and (F.4), we have

$$\begin{aligned} & \left[ \mathbf{A} \hat{\Sigma}^{-1} \hat{\Sigma}_\epsilon \hat{\Sigma}^{-1} \mathbf{A}^\top + \mathbf{A} \hat{\Sigma}_{\phi_M, \psi_M} \mathbf{A}^\top \right]^{-1/2} \left[ \sqrt{n} (\mathbf{A} \hat{\beta} - \mathbf{b}) \right] \\ & \xrightarrow{L} N \left( \left[ \mathbf{A} \Sigma_0^{-1} \Sigma_{0\epsilon} \Sigma_0^{-1} \mathbf{A}^\top + \mathbf{A} \Sigma_{\phi, \psi} \mathbf{A}^\top \right]^{-1/2} \mathbf{c}, \mathbf{I}_k \right). \end{aligned} \quad (\text{F.5})$$

Then, according to (F.5), the continuous mapping theorem entails that

$$\begin{aligned} & \mathcal{T}_n \\ & = n (\mathbf{A} \hat{\beta} - \mathbf{b})^\top \left[ \mathbf{A} \hat{\Sigma}^{-1} \hat{\Sigma}_\epsilon \hat{\Sigma}^{-1} \mathbf{A}^\top + \mathbf{A} \hat{\Sigma}_{\phi, \psi} \mathbf{A}^\top \right]^{-1} (\mathbf{A} \hat{\beta} - \mathbf{b}) \\ & \xrightarrow{L} \chi_k^2(\pi_{\mathbf{c}}), \end{aligned} \quad (\text{F.6})$$

where  $\chi_k^2(\pi_{\mathbf{c}})$  is the noncentral chi-squared distribution with degree of freedom  $k$ , and  $\pi_{\mathbf{c}}$  is the noncentrality parameter, defined as  $\pi_{\mathbf{c}} = \mathbf{c}^\top \left[ \mathbf{A} \Sigma_0^{-1} \Sigma_{0\epsilon} \Sigma_0^{-1} \mathbf{A}^\top + \mathbf{A} \Sigma_{\phi, \psi} \mathbf{A}^\top \right]^{-1} \mathbf{c}$ . We have completed the proof of Theorem 7.

## 5. PROOF OF THEOREM 8

**Step 1** In this step, we establish the asymptotic order of minimizer estimator  $\hat{\beta}_P$ . Define

$$\mathcal{L}_P(\beta) = \frac{1}{2} \sum_{i=1}^n \left\{ \hat{Y}_i - \hat{S}_Y(Z_i) - \left[ \hat{\mathbf{X}}_i - \hat{S}_{\mathbf{X}}(Z_i) \right]^\top \beta \right\}^2 + n \sum_{s=1}^p p_{\zeta_s}(|\beta_s|).$$

Let  $\kappa_n = n^{-1/2} + a_n^*$  with  $a_n^* = \max_{1 \leq j \leq p} \{p'_{\zeta_j}(|\beta_{0j}|), \beta_{0j} \neq 0\}$ , and  $\mathbf{s} = (s_1, \dots, s_p)^\top$  with  $\|\mathbf{s}\| = C_0$ . Moreover, we define  $\beta(n) = \beta_0 + \kappa_n \mathbf{s}$  and

$$\begin{aligned} \mathcal{F}_{n,1} &= \frac{1}{2} \sum_{i=1}^n \left\{ \hat{Y}_i - \hat{S}_Y(Z_i) - \left[ \hat{\mathbf{X}}_i - \hat{S}_{\mathbf{X}}(Z_i) \right]^\top \beta(n) \right\}^2 \\ &\quad - \frac{1}{2} \sum_{i=1}^n \left\{ \hat{Y}_i - \hat{S}_Y(Z_i) - \left[ \hat{\mathbf{X}}_i - \hat{S}_{\mathbf{X}}(Z_i) \right]^\top \beta_0 \right\}^2 \\ \mathcal{F}_{n,2} &= -n \sum_{j=1}^{p_0} \{p_{\zeta_j}(|\beta_{0j} + \kappa_n s_j|) - p_{\zeta_j}(|\beta_{0j}|)\}. \end{aligned}$$

Using (B.23)-(B.24), we have

$$\begin{aligned} \mathcal{F}_{n,1} &= \frac{1}{2} \kappa_n^2 \sum_{i=1}^n \mathbf{s}^\top \left[ \hat{\mathbf{X}}_i - \hat{S}_{\mathbf{X}}(Z_i) \right]^{\otimes 2} \mathbf{s} \\ &\quad - \kappa_n \sum_{i=1}^n \mathbf{s}^\top \left[ \hat{\mathbf{X}}_i - \hat{S}_{\mathbf{X}}(Z_i) \right]^\top (\hat{\beta} - \beta_0) \\ &= \frac{n}{2} \kappa_n^2 \mathbf{s}^\top \Sigma_0 \mathbf{s} - n \kappa_n \mathbf{s}^\top \Sigma_0 (\hat{\beta} - \beta_0) \\ &\quad + o_P(n \kappa_n^2 C_0^2) + o_P(n^{1/2} \kappa_n C_0) \end{aligned} \quad (\text{G.1})$$

As  $a_n^* = O_P(n^{-1/2})$ , we have  $\kappa_n = O_P(n^{-1/2})$  and the asymptotic expression (G.1) entails that the first argument of  $\mathcal{D}_{n,1}$  is positive and dominated by  $\frac{n}{2} \kappa_n^2 C_0^2$  in probability and the second argument of is dominated by  $C_0 O_P(1)$ . Taylor expansion and Cauchy-Schawz inequality entail that

$$|\mathcal{F}_{n,2}| \leq n \sqrt{p_0} \kappa_n a_n^* \|\mathbf{s}\| + n \kappa_n^2 a_n^{**} \|\mathbf{s}\|^2 \leq C_0 n \kappa_n^2 \{\sqrt{p_0} + a_n^{**} C_0\}.$$

where  $a_n^{**} = \max_{1 \leq j \leq p} \{p_{\zeta_j}''(|\beta_{0j}|), \beta_{0j} \neq 0\}$ . Furthermore,  $\mathcal{D}_{n,2}$  is bounded by  $n\kappa_n^2 C_0^2$  in probability. Thus, as  $a_n^{**}, b_n^{**}$  tend to 0 and  $C_0$  sufficiently large,  $\mathcal{D}_{n,1}$  dominates  $\mathcal{D}_{n,2}$ . As a consequence, for any given  $\delta > 0$ , there exists a large constant  $C_0$  such that

$$P \left\{ \inf_{\mathcal{S}} \mathcal{L}_P(\beta(n)) > \mathcal{L}_P(\beta_0) \right\} \geq 1 - \delta,$$

where  $\mathcal{S} = \{s : \|s\| = C_0\}$ . We conclude that  $\hat{\beta}_P$  is  $O_P(n^{-1/2})$ .

**Step 2.** Let  $\beta_1^*$  satisfies  $\|\beta_1^* - \beta_{01}\| = O_P(n^{-1/2})$ . Similar to the proof of Lemma 1 in Fan and Li (2001), we can show that

$$\mathcal{L}_P \left( (\beta_1^{*T}, \mathbf{0}^T)^T \right) = \min_{\mathcal{L}^*} \mathcal{L}_P \left( (\beta_1^{*T}, \beta_2^{*T})^T \right), \quad (\text{G.2})$$

where,  $\mathcal{L}^* = \{\|\beta_2^*\| \leq L^* n^{-1/2}\}$  and  $L^*$  is a positive constant. We omit the details for the proof in this step.

**Step 3.** Denote that  $\hat{\beta}_{P,1}$  is the penalized least squares estimator of  $\beta_{0,1}$ . In addition, we denote that  $\hat{X}_{i,1}$  and  $\hat{S}_{X,1}(Z_i)$  consist of the first  $p_0$  components of  $\hat{X}_i$  and  $\hat{S}_X(Z_i)$ , respectively. Define  $\mathcal{L}_P^*(\beta_1) = \mathcal{L}_P \left( (\beta_1^T, \mathbf{0}^T)^T \right)$ . Taylor expansion entails that

$$\begin{aligned} \mathbf{0} &= \left. \frac{\partial \mathcal{L}_P^*(\beta_1)}{\partial \beta_1} \right|_{\beta_1 = \hat{\beta}_{P,1}} \\ &= - \sum_{i=1}^n \left[ \hat{X}_{i,1} - \hat{S}_{X,1}(Z_i) \right] \left\{ \hat{Y}_i - \left[ \hat{X}_{i,1} - \hat{S}_{X,1}(Z_i) \right]^T \beta_{0,1} \right\} \\ &\quad + n\mathcal{R}_{\zeta_1} + \left( \sum_{i=1}^n \left[ \hat{X}_{i,1} - \hat{S}_{X,1}(Z_i) \right]^{\otimes 2} + n\mathbf{\Sigma}_{\zeta_1} \right) (\hat{\beta}_{P,1} - \beta_{0,1}) + O_P(\delta_n), \end{aligned} \quad (\text{G.3})$$

where  $\delta_n = n\|\hat{\beta}_{P,1} - \beta_{01}\|^2$ . Similar to (B.24), we have that

$$\begin{aligned} &\frac{1}{\sqrt{n}} \sum_{i=1}^n \left[ \hat{X}_{i,1} - \hat{S}_{X,1}(Z_i) \right] \left\{ \hat{Y}_i - \left[ \hat{X}_{i,1} - \hat{S}_{X,1}(Z_i) \right]^T \beta_{0,1} \right\} \\ &\xrightarrow{\mathcal{L}} N(\mathbf{0}_{p_0}, \mathbf{\Sigma}_{0\epsilon,1} + \mathbf{\Sigma}_{0,1} \mathbf{\Sigma}_{\phi, \psi_1} \mathbf{\Sigma}_{0,1}), \end{aligned} \quad (\text{G.4})$$

where  $\mathbf{\Sigma}_{0\epsilon,1}$ ,  $\mathbf{\Sigma}_{0,1}$  and  $\mathbf{\Sigma}_{\phi, \psi_1}$  are defined in Theorem 1. The asymptotic expression (G.2) and (G.4) entail that

$$\begin{aligned} &\sqrt{n} (\mathbf{\Sigma}_{0,1} + \mathbf{\Sigma}_{\zeta_1}) \left\{ (\hat{\beta}_{P,1} - \beta_{0,1}) + (\mathbf{\Sigma}_{0,1} + \mathbf{\Sigma}_{\zeta_1})^{-1} \mathcal{R}_{\zeta_1} \right\} \\ &\xrightarrow{\mathcal{L}} N(\mathbf{0}_{p_0}, \mathbf{\Sigma}_{0\epsilon,1} + \mathbf{\Sigma}_{0,1} \mathbf{\Sigma}_{\phi, \psi_1} \mathbf{\Sigma}_{0,1}). \end{aligned}$$

We have completed the proof of Theorem 8.

## REFERENCES

- Fan, J. and Li, R. (2001). Variable selection via nonconcave penalized likelihood and its oracle properties, *Journal of the American Statistical Association* **96**(456): 1348–1360.
- Liang, H. and Li, R. (2009). Variable selection for partially linear models with measurement errors, *Journal of the American Statistical Association* **104**: 234–248.

- Mack, Y. P. and Silverman, B. W. (1982). Weak and strong uniform consistency of kernel regression estimates, *Zeitschrift für Wahrscheinlichkeitstheorie und Verwandte Gebiete* **61**(3): 405–415.
- Owen, A. (1991). Empirical likelihood for linear models, *The Annals of Statistics* **19**: 1725–1747.
- Serfling, R. J. (1980). *Approximation Theorems of Mathematical Statistics*, John Wiley & Sons Inc., New York.
- Zhang, J., Zhou, N., Sun, Z., Li, G. and Wei, Z. (2016). Statistical inference on restricted partial linear regression models with partial distortion measurement errors, *Statistica Neerlandica. Journal of the Netherlands Society for Statistics and Operations Research* **70**(4): 304–331.
